# Supplementary material
Source: PubMed Central journal article supplement (PMC4409329)
Supplement: NIHMS680346-supplement-1.pdf [file NIHMS680346-supplement-1.pdf]

## Supplementary Material

### Crystal structure of a fully glycosylated HIV-1 gp120 core reveals a stabilizing role for the glycan at Asn262

Leopold Kong<sup>1,2,3,4</sup>,  
Ian A. Wilson<sup>2,3,4,5,\*</sup> and Peter D. Kwong<sup>1,\*</sup>

<sup>1</sup>Vaccine Research Center, National Institutes of Health, Bethesda, Maryland 20892, USA.

<sup>2</sup>Department of Integrative Structural and Computational Biology, The Scripps Research Institute, La Jolla, California, USA.

<sup>3</sup>International AIDS Vaccine Initiative Neutralizing Antibody Center, The Scripps Research Institute, La Jolla, California, USA.

<sup>4</sup>Scripps Center for HIV/AIDS Vaccine Immunology and Immunogen Discovery, The Scripps Research Institute, La Jolla, California, USA.

<sup>5</sup>Skaggs Institute for Chemical Biology, The Scripps Research Institute, La Jolla, California, USA.

\*Correspondence to:

Peter D. Kwong, Vaccine Research Center, Building 40, Room 4508, 40 Convent Drive, Bethesda, Maryland 20892, USA. Tel.: 1-301-594-8439; Fax: 1-301-480-2658; E-mail: pdkwong@nih.gov

Ian A. Wilson, Department of Integrative Structural and Computational Biology, BCC206, 10550 N. Torrey Pines Rd., La Jolla, California 92037, USA. Tel.: 1-858-784-9706; Fax: 1-858-784-2980; E-mail: wilson@scripps.edu

**Grant Sponsor:** NIH grants RO1 AI084817 (I.A.W.), Scripps CHAVI-ID UM1 AI100663 (I.A.W.), GM U54 GM94586 (I.A.W.), and the Intramural Research Program of the Vaccine Research Center, NIAID/NIH.

**Keywords:** HIV-1 gp120, glycan shield, role of N262

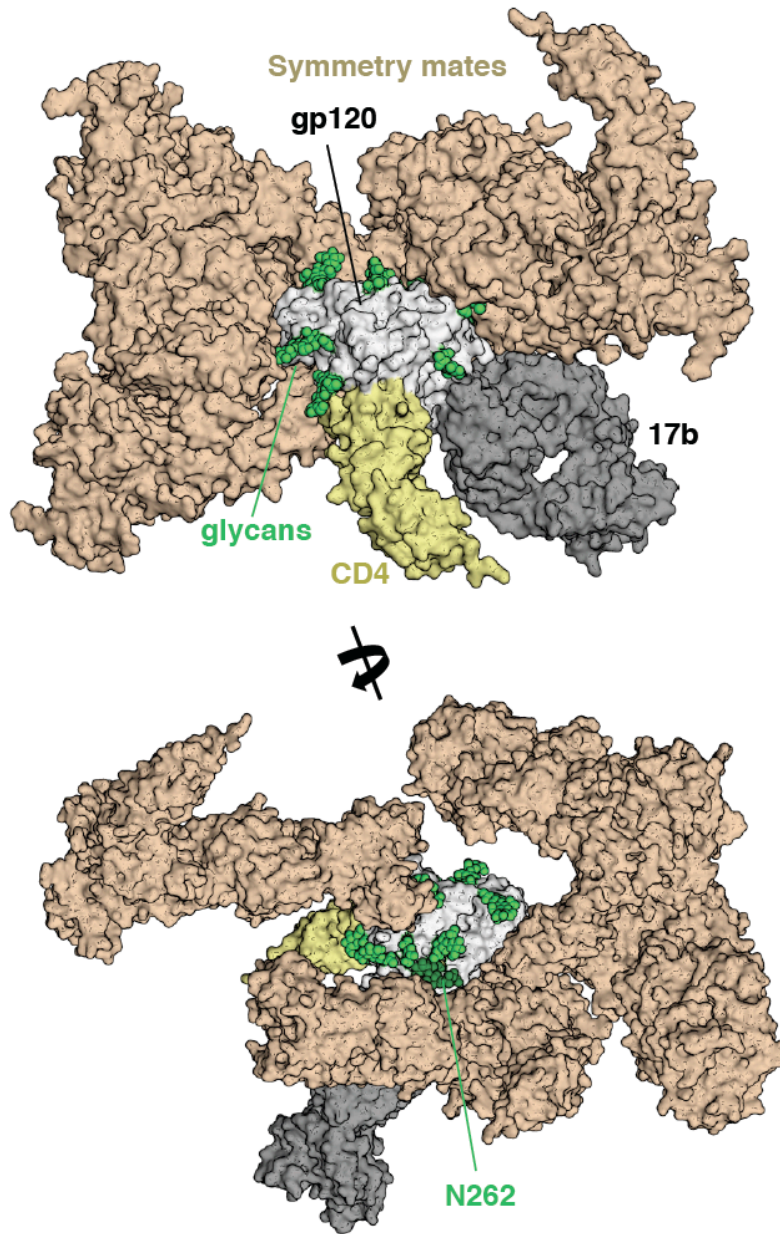

**Figure S1**

Crystal packing of the complex of gp20 core, Fab17b and CD4. The asymmetric unit, consisting of YU2 gp120 core (grey), 17b Fab (charcoal) and two-domain CD4 (D1D2) (yellow), is shown as a molecular surface packed against neighboring symmetry mates (light brown). Glycans in the asymmetric unit are displayed as green spheres.
